# Supplementary material for: Interaction of Oxicam Derivatives with the Artificial Models of Biological Membranes—Calorimetric and Fluorescence Spectroscopic Study
Source: MDPI journal article supplement (doi:10.3390/membranes12080791), 2022-08-17
Supplement: s1 [file s1]

## Supplementary Materials

# Interaction of Oxicam Derivatives with the Artificial Models of Biological Membranes – Calorimetric and Fluorescence Spectroscopic Study

Jadwiga Maniewska <sup>1,\*</sup>, Żaneta Czyżnikowska <sup>2</sup>, Berenika M. Szczęśniak-Sięga <sup>1</sup>, and Krystyna Michalak <sup>3</sup>

<sup>1</sup> Department of Medicinal Chemistry, Faculty of Pharmacy, Wrocław Medical University, Borowska 211, 50-556 Wrocław, Poland

<sup>2</sup> Department of Inorganic Chemistry, Faculty of Pharmacy, Wrocław Medical University, Borowska 211a, 50-556 Wrocław, Poland

<sup>3</sup> Department of Biophysics and Neuroscience, Faculty of Medicine, Wrocław Medical University, Chalubińskiego Poland

\* Correspondence: [jadwiga.maniewska@umw.edu.pl](mailto:jadwiga.maniewska@umw.edu.pl); Tel.: +48-71-784-03-97

**Table S1.** Absorption and distribution of studied oxicam derivatives.

| Parameter                                                                                                                                                              | Compound             |                      |                      |                      |                    |                      |
|------------------------------------------------------------------------------------------------------------------------------------------------------------------------|----------------------|----------------------|----------------------|----------------------|--------------------|----------------------|
|                                                                                                                                                                        | PR1                  | PR2                  | PR12                 | PR26                 | PR27               | PR38                 |
| HIA (Human Intestinal Absorption; Category 1: HIA+( HIA < 30%); Category 0: HIA-( HIA < 30%); The output value is the probability of being HIA+)                       | 0.3                  | 0.04                 | 0.01                 | 0.02                 | 0.01               | 0.01                 |
| Caco-2 Permeability; optimal higher than -5.15 log cm/s                                                                                                                | -5.7                 | -5.8                 | -5.7                 | -5.5                 | -5.4               | -5.7                 |
| MDCK Permeability; high passive permeability: >20·10 <sup>-6</sup>                                                                                                     | 3.2·10 <sup>-5</sup> | 2.9·10 <sup>-5</sup> | 2.9·10 <sup>-5</sup> | 3.4·10 <sup>-5</sup> | 3·10 <sup>-5</sup> | 3.1·10 <sup>-5</sup> |
| F 20% (20% Bioavailability; Category 1: F20%+ (bioavailability < 20%); Category 0: F20%- (bioavailability ≥ 20%); The output value is the probability of being F20% +) | 0.5                  | 0.4                  | 0.1                  | 0.01                 | 0.03               | 0.01                 |

|                                                                                                                                                                                          |     |     |      |      |      |     |
|------------------------------------------------------------------------------------------------------------------------------------------------------------------------------------------|-----|-----|------|------|------|-----|
| F 30% (30% Bioavailability;<br>Category 1: F30%+<br>(bioavailability < 30%);<br>Category 0: F30%-<br>(bioavailability ≥ 30%); The<br>output value is the<br>probability of being F30% +) | 0.9 | 0.9 | 0.01 | 0.03 | 0.04 | 0.1 |
| PPB (Plasma Protein<br>Binding; Optimal < 90%.<br>Drugs with high protein-<br>bound may have a low<br>therapeutic index)                                                                 | 98% | 98% | 98%  | 98%  | 98%  | 98% |
| VD (Volume Distribution;<br>Optimal 0.04-20L/kg)                                                                                                                                         | 1.9 | 0.4 | 0.4  | 1.9  | 0.4  | 1.8 |
| BBB Penetration (Blood-Brain<br>Barrier Penetration Category;<br>1: BBB+; Category 0: BBB-;<br>The output value is the<br>probability of being BBB+)                                     | 0.7 | 0.2 | 0.2  | 0.6  | 0.1  | 0.5 |

**Table S2.** Metabolism and excretion of oxacam derivatives.

| Parameter                                                                                                        | Compound |     |      |      |      |      |
|------------------------------------------------------------------------------------------------------------------|----------|-----|------|------|------|------|
|                                                                                                                  | PR1      | PR2 | PR12 | PR26 | PR27 | PR38 |
| CYP1A2 inhibitor                                                                                                 | no       | no  | no   | no   | no   | no   |
| CYP2C19 inhibitor                                                                                                | yes      | yes | yes  | yes  | yes  | yes  |
| CYP2C9 inhibitor                                                                                                 | yes      | yes | yes  | yes  | yes  | yes  |
| CYP2D6 inhibitor                                                                                                 | yes      | no  | no   | no   | no   | yes  |
| CYP3A4 inhibitor                                                                                                 | yes      | yes | yes  | yes  | yes  | yes  |
| CL Clearance (High: >15<br>mL/min/kg; moderate: 5-15<br>mL/min/kg; low)                                          | 4.2      | 3.4 | 4.0  | 4.2  | 3.1  | 5.3  |
| T 1/2Category (1: long half-life ;<br>Category 0: short half-life; long<br>half-life: >3h; short half-life: <3h) | 0.06     | 0.2 | 0.09 | 0.02 | 0.08 | 0.02 |

**Table S3.** Toxicity of oxicam derivatives.

| Parameter                                                                              | Compound |      |       |       |       |       |
|----------------------------------------------------------------------------------------|----------|------|-------|-------|-------|-------|
|                                                                                        | PR1      | PR2  | PR12  | PR26  | PR27  | PR38  |
| hERG Blockers, (heart rhythm disturbances)<br>1: active; 0: inactive                   | 0.6      | 0.07 | 0.07  | 0.7   | 0.1   | 0.7   |
| H-HT Human Hepatotoxicity<br>1: positive(+); 0: negative(-)                            | 0.9      | 0.9  | 1.0   | 1.0   | 0.9   | 1.0   |
| DILI Drug Induced Liver Injury<br>1: drugs with a high risk;<br>0: drugs with no risk. | 1.0      | 1.0  | 1.0   | 1.0   | 1.0   | 1.0   |
| AMES Toxicity<br>1: Ames positive(+);<br>0: Ames negative(-)                           | 0.3      | 0.05 | 0.05  | 0.4   | 0.07  | 0.2   |
| Rat Oral Acute Toxicity<br>0: low toxicity; 1: high toxicity                           | 0.2      | 0.8  | 0.8   | 0.2   | 0.7   | 0.2   |
| Skin Sensitization<br>1: Sensitizer; 0: Non-sensitizer                                 | 0.04     | 0.06 | 0.04  | 0.03  | 0.04  | 0.04  |
| Carcinogen<br>1: carcinogens; Category 0:<br>non-carcinogens                           | 0.1      | 0.4  | 0.4   | 0.1   | 0.4   | 0.1   |
| Eye Irritation<br>1: irritants;<br>0: nonirritants                                     | 0.007    | 0.03 | 0.006 | 0.006 | 0.006 | 0.006 |
| Respiratory Toxicity<br>1: respiratory toxicants;<br>0: respiratory nontoxicants       | 0.2      | 0.1  | 0.08  | 0.1   | 0.075 | 0.1   |
